# Supplementary material for: ‘Sweeter Than a Swisher’: amount and themes of little cigar and cigarillo content on Twitter
Source: PubMed Central journal article supplement — Tob Control. 2016 Oct;25(Suppl 1):i75–82. doi: 10.1136/tobaccocontrol-2016-053094 (PMC5099210; doi:10.1136/tobaccocontrol-2016-053094), 2016-10
Supplement: tobaccocontrol-2016-053094supp_appendix.pdf [file tobaccocontrol-2016-053094supp_appendix.pdf]

### Appendix 1. List of Little Cigar and Cigarillo Search Rules

|                                           |
|-------------------------------------------|
| littlecigar OR littlecigars               |
| milds                                     |
| optimo OR optimos lang: en contains:smok  |
| rello OR rellos lang: en contains:smok    |
| relo OR rels lang: en contains:smok"      |
| rillo OR rillos lang: en                  |
| rilo OR rilos lang: en contains:smok      |
| splitarillo OR splitarillos               |
| "al capone" OR "al capones" contains:smok |
| alcapone OR alcapones contains:smok       |
| blackstone OR blackstones contains:smok   |
| execbranch                                |
| panatella OR panatellas                   |
| rollgame                                  |
| swish contains:smok                       |
| swisher OR swishers"                      |
| captain black" OR "captain blacks"        |
| captainblack OR captainblacks             |
| lil cigar" OR "lil cigars"                |
| red buck" OR "red bucks"                  |
| white cat" OR "white cats,contains:smok"  |
| white owl" OR "white owls"                |
| backwoods                                 |
| sweetwoods                                |
| blunts                                    |

|                                               |
|-----------------------------------------------|
| cigar OR cigars                               |
| cigarillo OR cigarillos lang: en              |
| djarum OR djarums                             |
| dutches                                       |
| havatampa OR havatampas                       |
| hoodwrap OR hoodwraps                         |
| (whitecat OR whitecats) contains:smok         |
| whiteowl OR whiteowls                         |
| cohiba OR cohibas                             |
| garcia y vega" OR "garcia y vegas" lang: en", |
| contains: stog lang:en contains:smok          |
| stogie                                        |
| stogies                                       |
| stogs                                         |
| stogy                                         |
| blackmild OR blackmilds                       |
| "black & mild"                                |
| "gold & mild" - coffee",                      |
| doobies                                       |
| "mini dutches"                                |
| bluntville OR bluntvilles                     |
| goodtimeshot100                               |
| goodtimeshot100djs                            |
| littlenwild                                   |
| goodtimeseverytime                            |
| "pom pom operas"                              |
| "dutch masters"                               |

|                                                                                              |
|----------------------------------------------------------------------------------------------|
| blunt -"James blunt" -"Emily Blunt" -st_blunt -"too blunt" -"be blunt" lang:en"              |
| zig zag" OR "zig zags,contains: SMOK"                                                        |
| (zigzag OR zigzags) contains: SMOK"                                                          |
| phillies contains: SMOK                                                                      |
| phillys contains: SMOK                                                                       |
| 305's lang:en                                                                                |
| 305s lang:en                                                                                 |
| talon contains: SMOK lang: en                                                                |
| “smoker's choice”                                                                            |
| panatela OR panatelas                                                                        |
| #sotl OR #botl                                                                               |
| #nowsmoking                                                                                  |
| fronto                                                                                       |
| fonto lang:en                                                                                |
| garcia OR garcias lang:en                                                                    |
| contains splif [removed after one week of data collection and preprocessing]                 |
| "blunt ville" OR "blunt viles" [removed after one week of data collection and preprocessing] |
| "royal blunts" [removed after one week of data collection and preprocessing]                 |
